# Supplementary material
Source: PubMed Central journal article supplement (PMC10321319)
Supplement: NIHMS1864440-supplement-Supplement.pdf [file NIHMS1864440-supplement-Supplement.pdf]

**Supplementary Material for:**

**Title: A naturally inspired antibiotic to target multi-drug-resistant pathogens**

**Authors:** Zongqiang Wang<sup>1</sup>, Bimal Koirala<sup>1</sup>, Yozen Hernandez<sup>1</sup>, Matthew Zimmerman<sup>2</sup>, Steven Park<sup>2</sup>, David S. Perlin<sup>2</sup>, and Sean F. Brady<sup>1\*</sup>

<sup>1</sup>Laboratory of Genetically Encoded Small Molecules, The Rockefeller University, 1230 York Avenue, New York, NY 10065, United States

<sup>2</sup>Center for Discovery and Innovation, Hackensack Meridian Health, Nutley, NJ 07110, United States

**Corresponding Author:** Sean F. Brady

**Contact:** Laboratory of Genetically Encoded Small Molecules  
The Rockefeller University  
1230 York Avenue  
New York, NY 10065

**Phone:** 212-327-8280

**Fax:** 212-327-8281

**Email:** [sbrady@rockefeller.edu](mailto:sbrady@rockefeller.edu)

## Supplementary Table S1 | Bacterial strain information

| Name of Bacteria               | Strain        | Resistant gene                                       | Selective Antibiotic          |
|--------------------------------|---------------|------------------------------------------------------|-------------------------------|
| <i>Enterococcus faecium</i>    | Com15         | N/A                                                  | N/A                           |
| <i>Staphylococcus aureus</i>   | SH1000        | N/A                                                  | N/A                           |
| <i>Klebsiella pneumoniae</i>   | 10031         | N/A                                                  | N/A                           |
| <i>Klebsiella pneumoniae</i>   | 0497          | N/A                                                  | N/A                           |
| <i>Klebsiella pneumoniae</i>   | ATCC13883     | N/A                                                  | N/A                           |
| <i>Acinetobacter baumannii</i> | ATCC17978     | N/A                                                  | N/A                           |
| <i>Acinetobacter baumannii</i> | SM1536        | N/A                                                  | N/A                           |
| <i>Pseudomonas aeruginosa</i>  | PAO1          | N/A                                                  | N/A                           |
| <i>Enterobacter cloacae</i>    | 0150          | N/A                                                  | N/A                           |
| <i>Salmonella typhimurium</i>  | 0635          | N/A                                                  | N/A                           |
| <i>Acinetobacter baumannii</i> | CDC 0282-0301 | N/A                                                  | N/A                           |
| <i>Neisseria gonorrhoeae</i>   | ATCC 49226    | EptA                                                 | N/A                           |
| <i>Neisseria meningitidis</i>  | ATCC 13090    | EptA                                                 | N/A                           |
| <i>Moraxella osloensis</i>     | ATCC10973     | EptA                                                 | N/A                           |
| <i>Proteus vulgaris</i>        | ATCC 49132    | ArnT                                                 | N/A                           |
| <i>Enterobacter cloacae</i>    | ATCC13047     | $\Delta$ <i>phoP/Q</i>                               | N/A                           |
| <i>Klebsiella pneumoniae</i>   | ATCC13883     | pBCSK- <i>mcr-1</i>                                  | 30 $\mu$ g/mL Chloramphenicol |
| <i>Acinetobacter baumannii</i> | ATCC17978     | pMQ124xlab1- <i>mcr-1</i>                            | 50 $\mu$ g/mL Gentamicin      |
| <i>Acinetobacter baumannii</i> | SM1536        | pMQ124xlab1- <i>mcr-1</i>                            | 50 $\mu$ g/mL Gentamicin      |
| <i>Acinetobacter baumannii</i> | CDC 0282-0301 | pMQ124xlab1- <i>mcr-1</i>                            | 50 $\mu$ g/mL Gentamicin      |
| <i>Enterobacter cloacae</i>    | ATCC13047     | $\Delta$ <i>phoP/Q</i> +pMMBKn- <i>phoP/Q</i> -6xhis | 50 $\mu$ g/mL Kanamycin       |

N/A: not applicable.

## Supplementary Table S2 | Accession number of polymyxin-like BGCs.

| Polymyxin-like BGCs | Organism Name                                                                                 | Accession code             |
|---------------------|-----------------------------------------------------------------------------------------------|----------------------------|
| Colistin            | <i>Paenibacillus alvei</i>                                                                    | KP262070.1                 |
| Polymyxin A         | <i>Paenibacillus polymyxa</i>                                                                 | EU371992.1                 |
| Polymyxin B         | <i>Paenibacillus polymyxa</i>                                                                 | JN660148.1                 |
| Macolacin           | <i>Paenibacillus_xylanexedens_strain_PAMC_22703</i>                                           | NZ_CP018620.1.cluster015   |
| CAT9-1              | <i>Paenibacillus_polymyxa_E681</i>                                                            | NC_014483.2.cluster009     |
| CAT9-2              | <i>Paenibacillus_polymyxa_SQR-21</i>                                                          | NZ_CP006872.1.cluster013   |
| CAT9-3              | <i>Paenibacillus_peoriae_strain_HS311</i>                                                     | NZ_CP011512.1.cluster012   |
| CAT9-4              | <i>Paenibacillus_polymyxa_strain_J</i>                                                        | NZ_CP015423.1.cluster003   |
| CAT9-5              | <i>Paenibacillus_polymyxa_strain_YC0573_chromosome</i>                                        | NZ_CP017968.3.cluster013   |
| CAT9-6              | <i>Paenibacillus_polymyxa_strain_ATCC_15970</i>                                               | NZ_CP011420.1.cluster011   |
| CAT9-7              | <i>Paenibacillus_sp._lzh-N1_chromosome</i>                                                    | NZ_CP025696.1.cluster005   |
| CAT9-8              | <i>Paenibacillus_sp._FSL_R5-0765_NODE_42_length_26692_cov_1.71286_ID_5187</i>                 | NZ_MRTS01000010.cluster016 |
| CAT9-9              | <i>Paenibacillus_assamensis_DSM_18201_H580DRAFT_scaffold00005.5</i>                           | NZ_KE383837.1.cluster005   |
| CAT9-10             | <i>Paenibacillus_alvei_TS-15_PAALTS15_52</i>                                                  | NZ_ATMT01000001.cluster004 |
| CAT9-11             | <i>Paenibacillus_polysaccharolyticus_strain_BL9</i>                                           | NZ_FMVM01000034.cluster011 |
| CAT9-12             | <i>Paenibacillus_amylolyticus_strain_FSL_F4-0260_NODE_28_length_22572_cov_1.32332_ID_3095</i> | NZ_MRTG01000010.cluster006 |
| CAT9-13             | <i>Paenibacillus_amylolyticus_strain_FSL_J3-0122_NODE_28_length_25344_cov_1.50965_ID_3188</i> | NZ_MRTO01000010.cluster009 |
| CAT9-14             | <i>Paenibacillus_polymyxa_strain_HY96-2_chromosome</i>                                        | NZ_CP025957.1.cluster013   |
| CAT9-15             | <i>Paenibacillus_polymyxa_strain_YC0136_chromosome</i>                                        | NZ_CP017967.2.cluster013   |
| CAT9-16             | <i>Paenibacillus_sp._CF095</i>                                                                | NZ_FMZN01000016.cluster015 |
| CAT9-18             | <i>Paenibacillus_polymyxa_ATCC_842_PPt02_scaffold1</i>                                        | NZ_GL905390.1.cluster013   |
| CAT9-19             | <i>Paenibacillus_polymyxa_strain_CICC_10580_contig_4</i>                                      | NZ_JNCB01000001.cluster003 |
| CAT9-20             | <i>Paenibacillus_polymyxa_A18_scaffold00005</i>                                               | NZ_JWJJ01000001.cluster011 |
| CAT9-21             | <i>Paenibacillus_polymyxa_strain_NRRL_B-30509_contig00006</i>                                 | NZ_JTHO01000001.cluster005 |
| CAT9-22             | <i>Paenibacillus_polymyxa_strain_EBL06_Scaffold18</i>                                         | NZ_KQ004561.1.cluster015   |
| CAT9-23             | <i>Paenibacillus_amylolyticus_strain_FSL_H7-0692_NODE_6_length_355017_cov_1.89367_ID_2749</i> | NZ_MRTI01000010.cluster014 |
| CAT9-24             | <i>Paenibacillus_sp._FSL_R5-192_Contig003</i>                                                 | NZ_ASPR01000001.cluster002 |
| CAT9-25             | <i>Paenibacillus_sp._FSL_H7-689_Contig007</i>                                                 | NZ_ASPU01000002.cluster003 |
| CAT9-26             | <i>Paenibacillus_sp._VT-400_contig65</i>                                                      | NZ_LELF01000001.cluster005 |
| CAT9-27             | <i>Paenibacillus_sp._cl6col</i>                                                               | NZ_FNAZ01000029.cluster009 |
| CAT9-28             | <i>Paenibacillus_sp._UNC217MF_BP95DRAFT_scaffold00014.14_C</i>                                | NZ_KK366027.1.cluster011   |
| CAT9-29             | <i>Paenibacillus_alvei_DSM_29_PAV_1c</i>                                                      | NZ_AMBZ01000023.cluster005 |
| CAT9-30             | <i>Paenibacillus_sp._PAMC_26794_5104_86</i>                                                   | NZ_ANHX01000001.cluster015 |
| CAT9-31             | <i>Paenibacillus_alvei_A6-6i-x_PAAL66ix_28</i>                                                | NZ_ATMS01000001.cluster016 |
| CAT9-32             | <i>Paenibacillus_polymyxa_M1_main_chromosome</i>                                              | NC_017542.1.cluster012     |
| CAT9-33             | <i>Paenibacillus_polymyxa_CR1</i>                                                             | NC_023037.2.cluster011     |
| CAT9-34             | <i>Paenibacillus_sp._Mc5Re-14</i>                                                             | NZ_CVPD01000001.cluster009 |
| CAT9-35             | <i>Paenibacillus_jamilae_strain_NS115_contig_45</i>                                           | NZ_LDRX01000001.cluster016 |

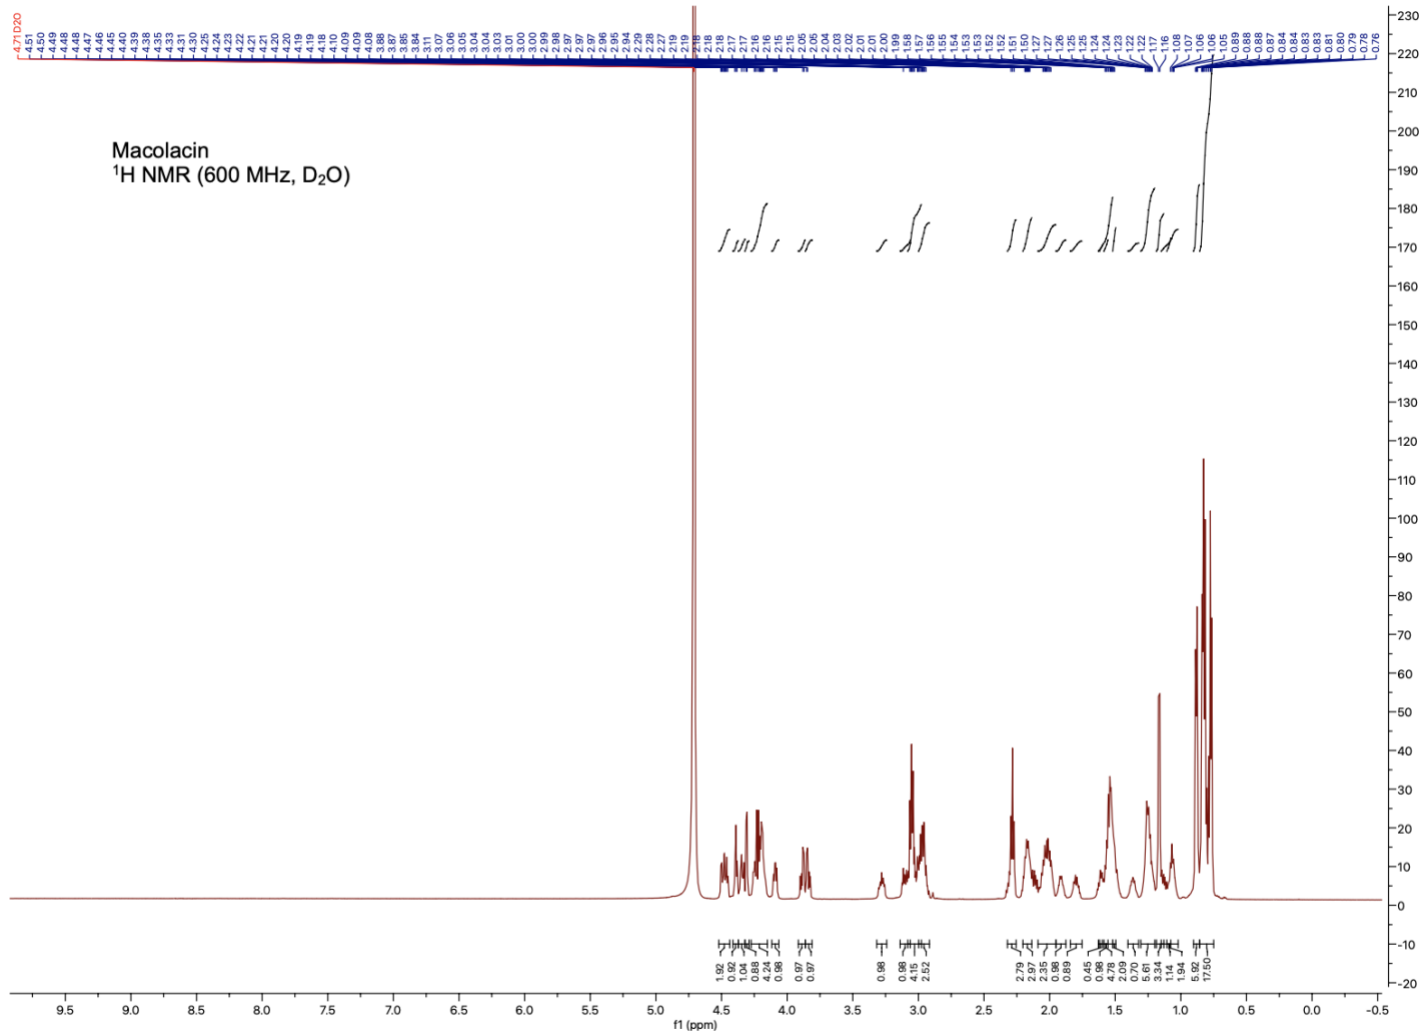

Supplementary Fig. S1 | <sup>1</sup>H NMR (600 MHz, D<sub>2</sub>O) spectrum of macolacin.

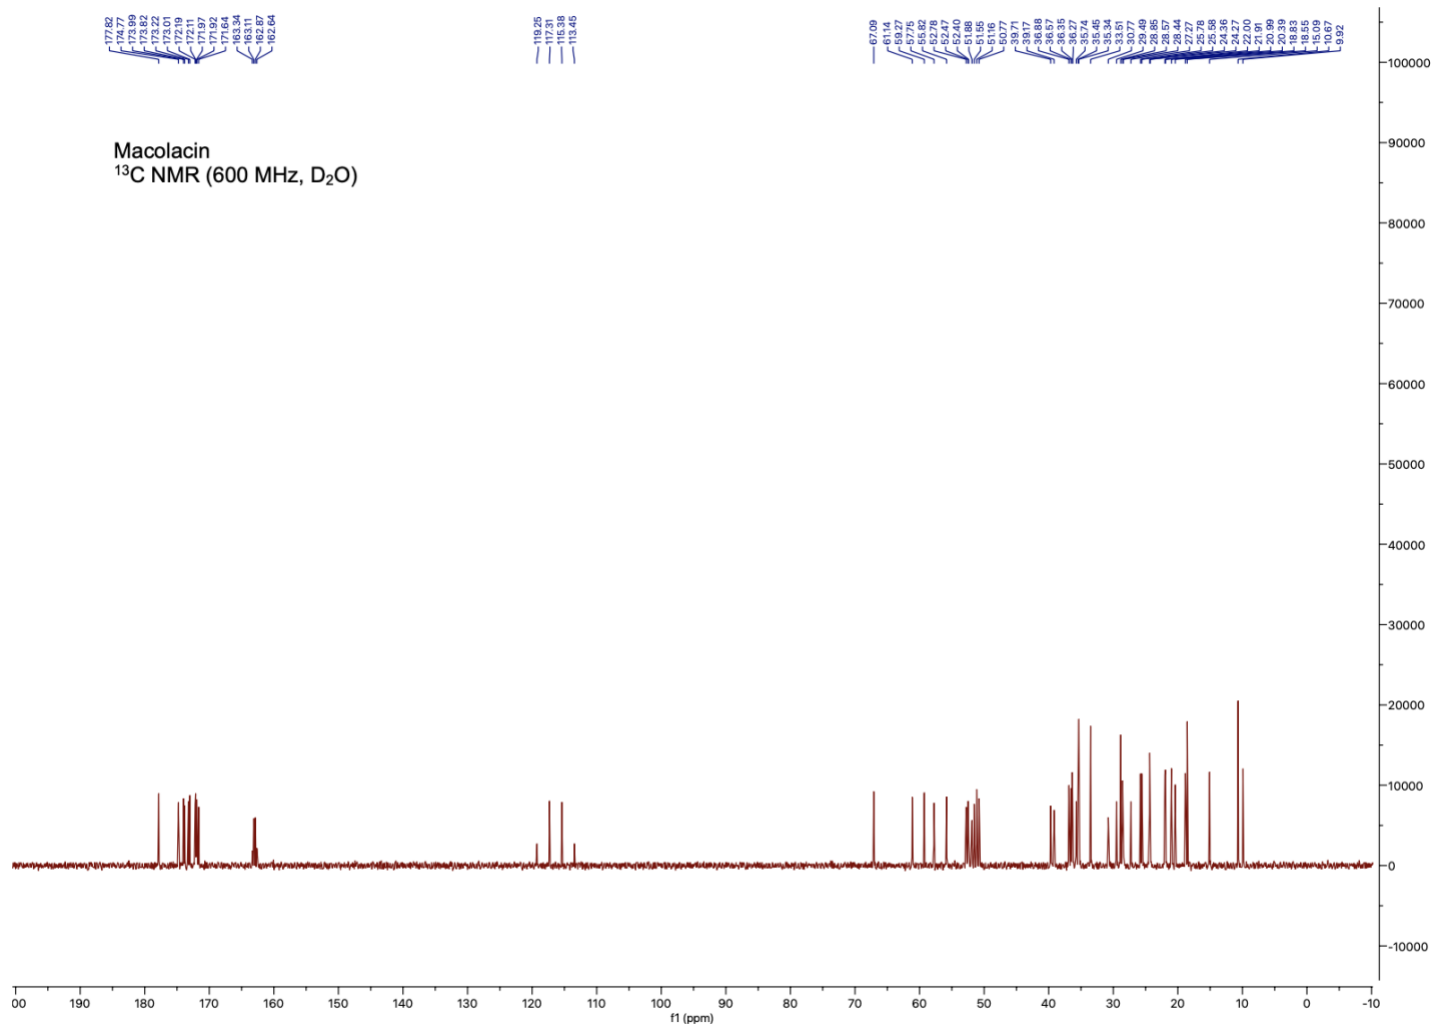

Supplementary Fig. S2 | <sup>13</sup>C NMR (600 MHz, D<sub>2</sub>O) spectrum of macolacin.

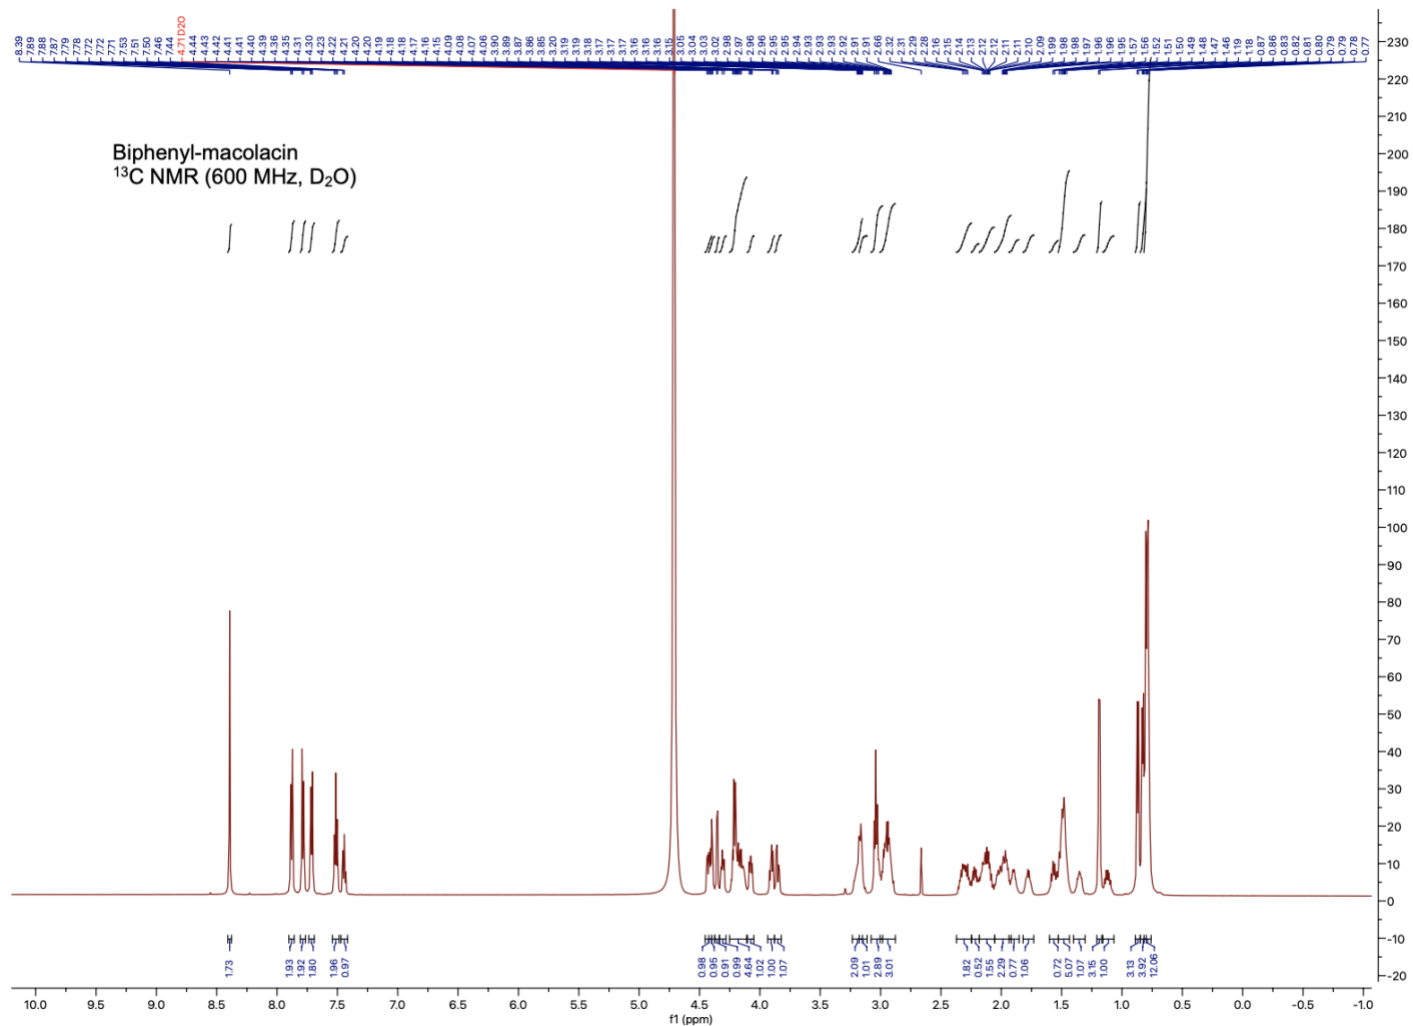

Supplementary Fig. S3 | <sup>1</sup>H NMR (600 MHz, D<sub>2</sub>O) spectrum of Biphenyl-macolacin.

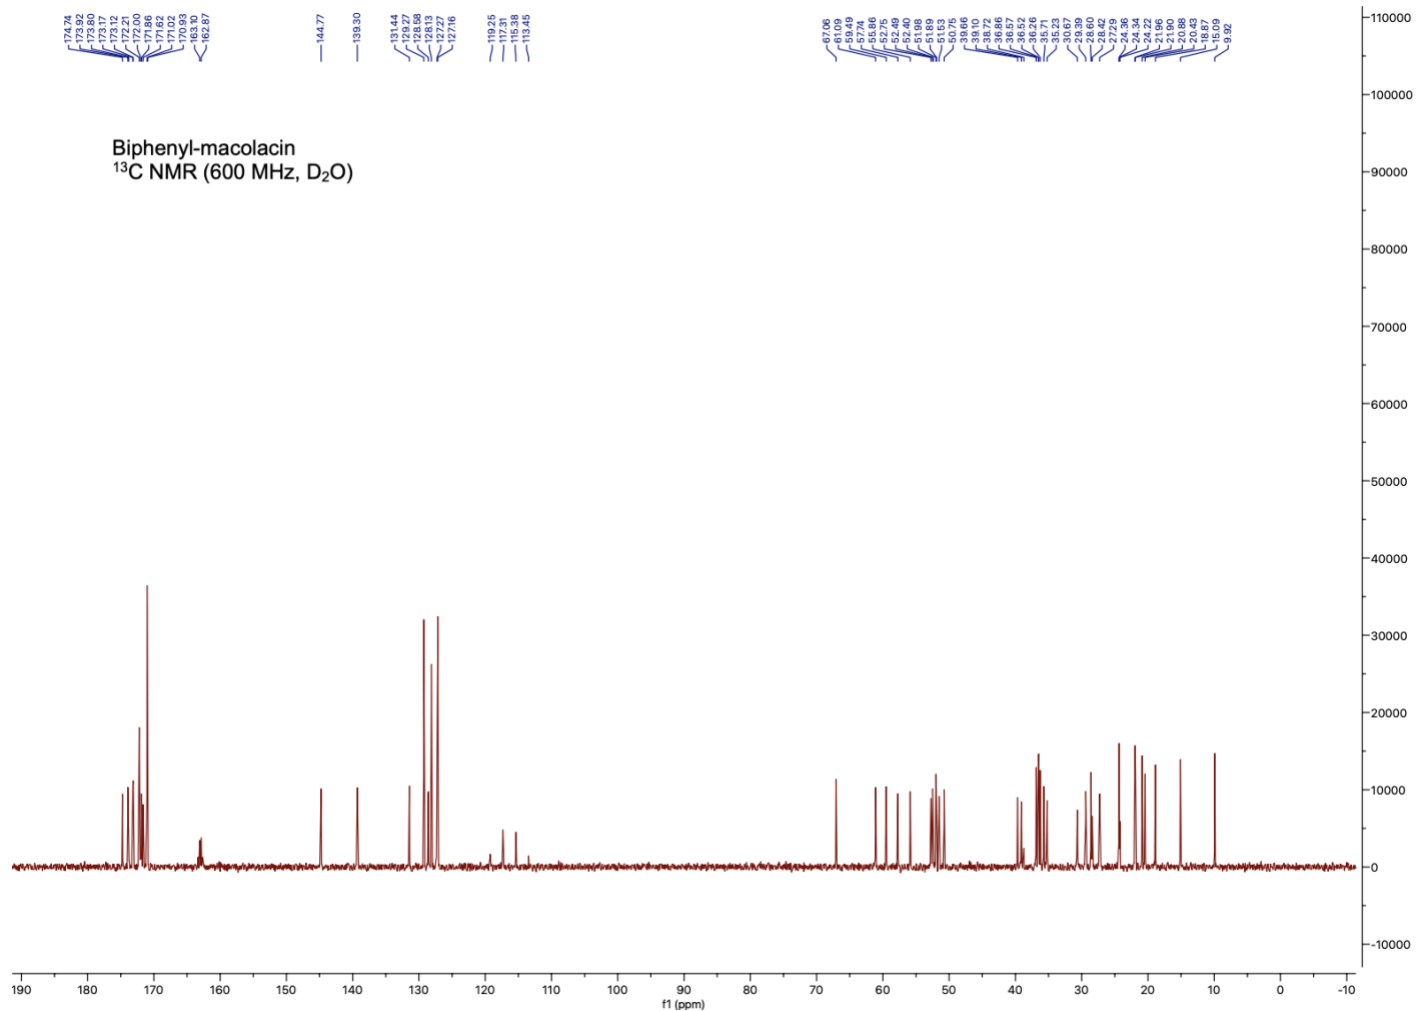

Supplementary Fig. S4 | <sup>13</sup>C NMR (600 MHz, D<sub>2</sub>O) spectrum of Biphenyl-macolacin.
